# Supplementary material for: Highly active spherical amorphous MoS2: facile synthesis and application in photocatalytic degradation of rose bengal dye and hydrogenation of nitroarenes
Source: Royal Society of Chemistry journal article supplement (doi:10.1039/c5ra19442c), 2015-01-01

1 **Supporting information for**

2 **Highly active spherical amorphous MoS<sub>2</sub> nanoparticles : Facile synthesis and**  
3 **application in photocatalytic degradation of rose bengal dye and**  
4 **hydrogenation of nitroarenes**

5

6 Namrata Saha,<sup>a</sup> Arpita Sarkar,<sup>a</sup> Abhisek Brata Ghosh,<sup>a</sup> Amit Kumar Dutta,<sup>a</sup> Gopala Ram Bhadu,<sup>b</sup>  
7 Parimal Paul,<sup>\*,b</sup> and Bibhutosha Adhikary<sup>\*,a</sup>

8

9

10

11

12

---

13 *<sup>a</sup>Department of Chemistry, Indian Institute of Engineering Science and Technology, Shibpur,*  
14 *Howrah -711 103, India.*

15 *<sup>b</sup>Department of Analytical Science, Central Salt and Marine Chemicals Research Institute,*  
16 *Gijubhai, Badheka Marg, Bhavnagar 364002, Gujarat, India*

17 \*E-mail: [bibhutoshadhikary@yahoo.in](mailto:bibhutoshadhikary@yahoo.in); Tel.: +91-033-2668-4561-64 ext: 512; Fax: +91-033-  
18 2668-2916

19 †Electronic supplementary information (ESI) available: Figures S1–S6.

20  
21  
22  
23  
24  
25  
26  
27  
28  
29  
30  
31  
32  
33  
34  
35  
36  
37  
38

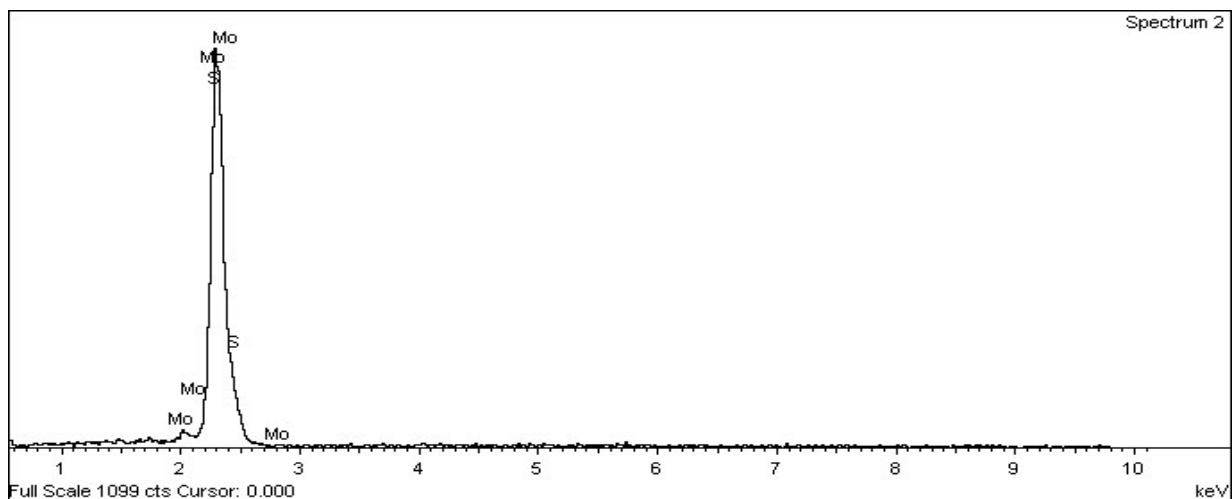

| Element | Weight% | Atomic% |
|---------|---------|---------|
| S K     | 43.38   | 69.63   |
| Mo L    | 56.62   | 30.37   |
| Totals  | 100.00  |         |

**Fig. S1** EDX Spectral data of amorphous MoS<sub>2</sub>.

39

40

41

42

43

44

45

46

47

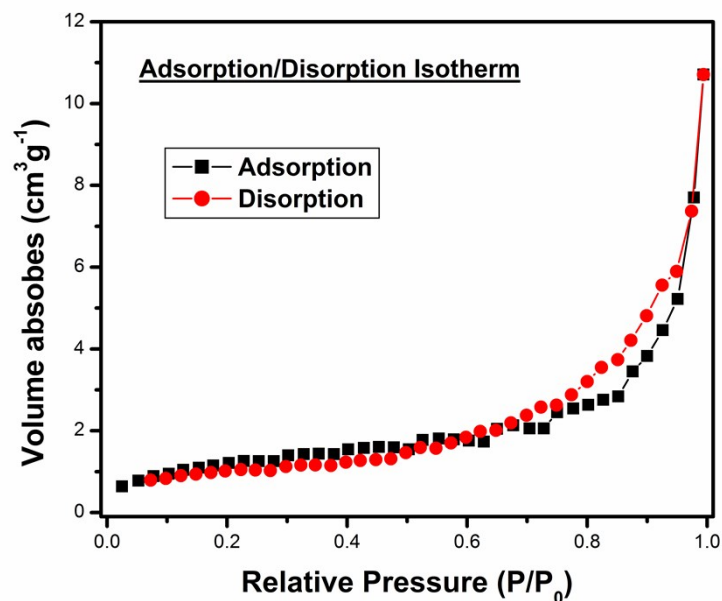

48 **Fig. S2** Nitrogen adsorption-desorption isotherm study and BET surface area analysis of as  
49 synthesized spherical amorphous MoS<sub>2</sub>.

50

51

52

53

54

55

56

57

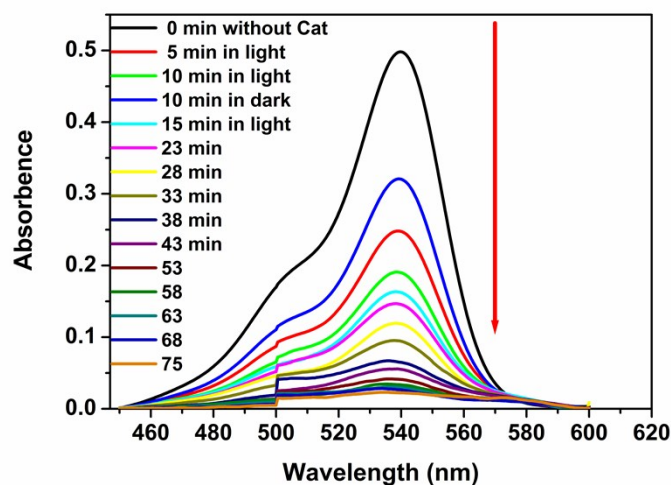

58 **Fig. S3** Degradation of RB in terms of relative concentration vs. time plots in presence of  
59 amorphous MoS<sub>2</sub> under light irradiation.

60

61

62

63

64

65

66

67

68

69

70

71

72

73

74

75

76

77

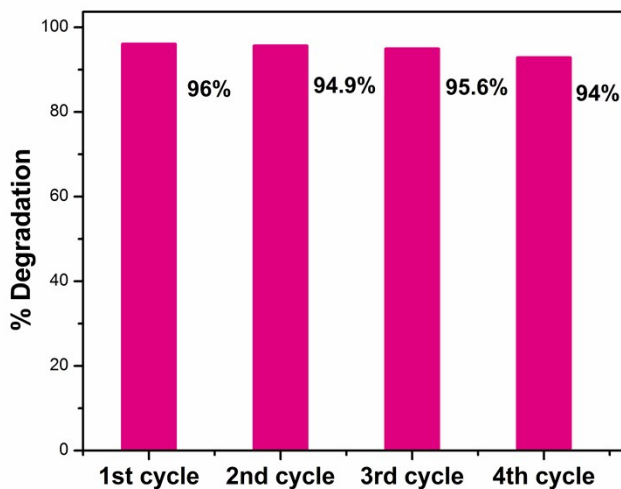

Fig. S4 Cyclic run for the catalytic decomposition of RB with amorphous MoS<sub>2</sub>.

78

79

80

81

82

83

84

85

86

87

88

89

90

91

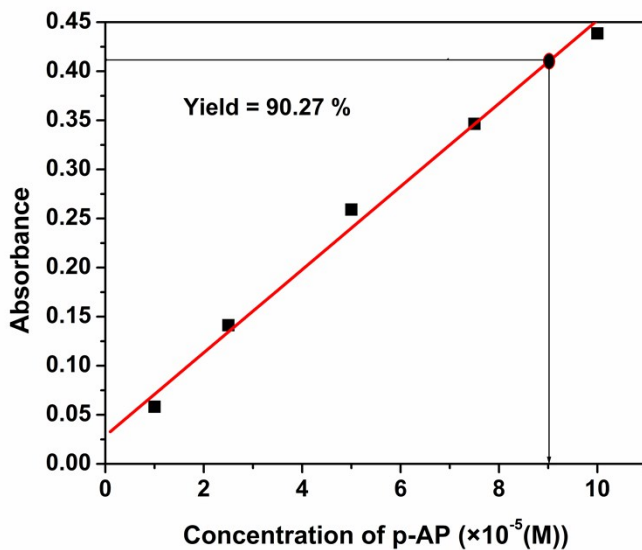

93

Fig. S5 Absorbance measurement of p-AP at different concentration to determine the percentage of yield in the reduction of p-NP.

96

97  
98  
99  
100  
101  
102  
103  
104  
105  
106  
107  
108  
109  
110  
111  
112  
113  
114  
115  
116  
117  
118  
119  
120

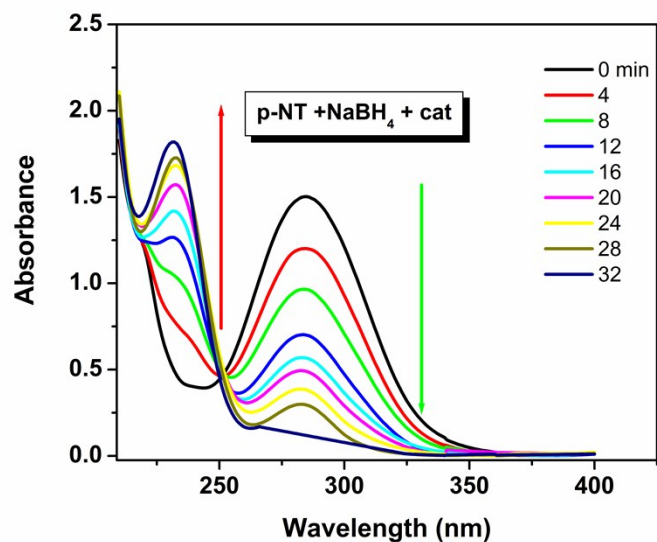

**Fig. S6** Time dependent absorption spectra for the catalytic reduction of p-NT by NaBH<sub>4</sub> in presence of amorphous MoS<sub>2</sub> [Conditions: [4-NT] = 1.0 × 10<sup>-4</sup>M; [Catalyst] = 0.4 g/L; [NaBH<sub>4</sub>] = 0.1M].

121

122

123

124

125

126

127

128

129

130

131

132

133 **Fig. S7** Time dependent absorption spectra for the catalytic reduction of p-NA by NaBH<sub>4</sub> in  
134 presence of amorphous MoS<sub>2</sub> [Conditions: [p-NA] = 1.0 × 10<sup>-4</sup>M; [Catalyst] = 0.4 g/L; [NaBH<sub>4</sub>]  
135 = [0.1M].

136

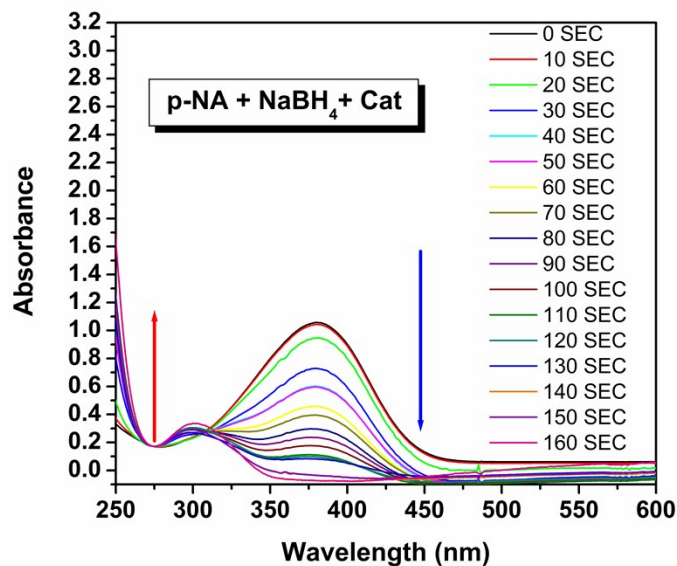

Supplement: c5ra19442c1.pdf [file c5ra19442c1.pdf]
